# Supplementary material for: A Gravity-Triggered Liquid Metal Patch Antenna with Reconfigurable Frequency
Source: MDPI journal article supplement (doi:10.3390/mi12060701), 2021-06-16
Supplement: s1 [file s1]

# A Gravity-Triggered Liquid Metal Patch Antenna with Reconfigurable Frequency

Peng Qin <sup>1,2</sup>, Guan-Long Huang <sup>3</sup>, Jia-Jun Liang <sup>4</sup>, Qian-Yu Wang <sup>1,2</sup>, Jun-Heng Fu <sup>1,2</sup>, Xi-Yu Zhu <sup>5</sup>, Tian-Ying Liu <sup>1,2</sup>, Lin Gui <sup>1,2</sup>, Jing Liu <sup>1,2,5</sup> and Zhong-Shan Deng <sup>1,2,\*</sup>

<sup>1</sup> CAS Key Laboratory of Cryogenics, Technical Institute of Physics and Chemistry, Chinese Academy of Sciences, Beijing 100190, China; qinpeng17@mails.ucas.edu.cn (P.Q.); wangqianyu19@mails.ucas.edu.cn (Q.-Y.W.); fujunheng17@mails.ucas.edu.cn (J.-H.F.); liutianying17@mails.ucas.edu.cn (T.-Y.L.); lingui@mail.ipc.ac.cn (L.G.); jliu@mail.ipc.ac.cn (J.L.)

<sup>2</sup> School of Future Technology, University of Chinese Academy of Sciences, Beijing 100049, China

<sup>3</sup> School of AI—Guangdong & Taiwan, Foshan University, Foshan 528225, China; hgl@fosu.edu.cn

<sup>4</sup> School of Physics and Telecommunication Engineering, Yulin Normal University, Yulin 537000, China; shuigpj@163.com

<sup>5</sup> Department of Biomedical Engineering, School of Medicine, Tsinghua University, Beijing 100084, China; zxy19@mails.tsinghua.edu.cn

\* Correspondence: zsdeng@mail.ipc.ac.cn; Tel.: +86-10-82543483

**Figure S1.**  $H_3$  was 0.5 mm, the covering layer of the substrate collapsed.

**Figure S2.** (a) After soldering the copper foil and the SMA connector, the substrate made of Accura® 60 deformed. (b) Two substrates made of the Accura® 60 (at left) and HI TEMP® 300 (at right).

**Table S1.** Performance comparison of the two photosensitive resins.

**Figure S3.** In an attempted process route, the substrate was made of PDMS.

**Figure S4.** Another clamp with two fins, which are convenient to fix the antenna but also affect the radiation field.

**Movie S1.** The reconstruction process of the antenna at different rotation angles.

**Table S2.** The measured full dataset of the return losses of the fabricated antenna under 19 angles.

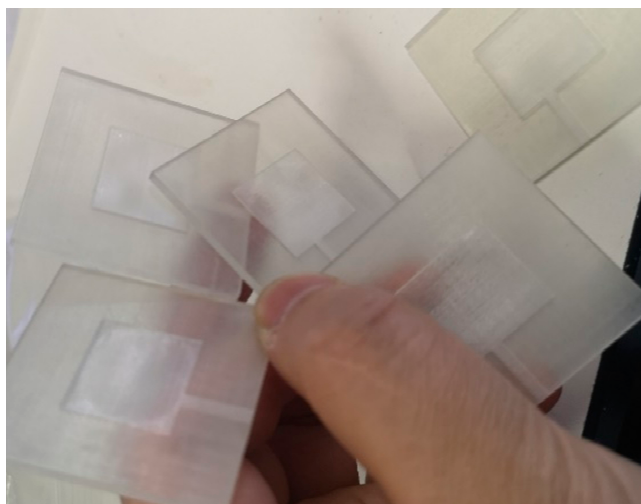

**Figure S1.**  $H_3$  was 0.5 mm, the covering layer of the substrate collapsed.

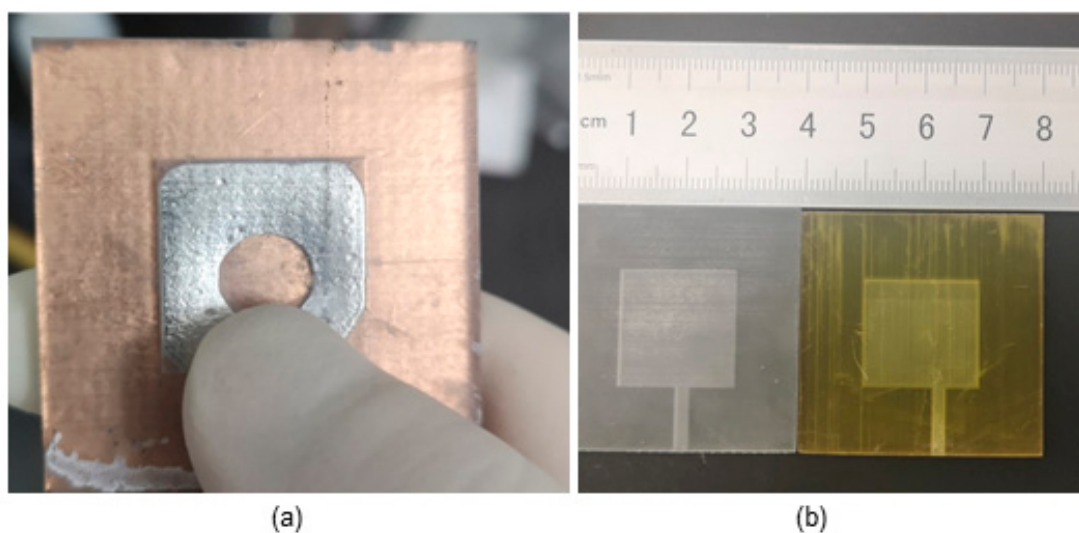

**Figure S2.** (a) After soldering the copper foil and the SMA connector, the substrate made of Accura® 60 deformed. (b) Two substrates made of the Accura® 60 (at left) and HI TEMP® 300 (at right).

**Table S1.** Performance comparison of the two photosensitive resins.

|                                              |             |              |
|----------------------------------------------|-------------|--------------|
| The type of material                         | Accura® 60  | HI TEMP® 300 |
| Printing method                              | SLA         | SLA          |
| The model of the printer                     | ProX 800    | Figure 4     |
| color                                        | Transparent | Amber        |
| Density in liquid state (g/cm <sup>3</sup> ) | 1.13        | 1.19         |
| Density in solid state (g/cm <sup>3</sup> )  | 1.21        | 1.3          |
| Thermal deformation temperature (°C)         | 53          | 300          |

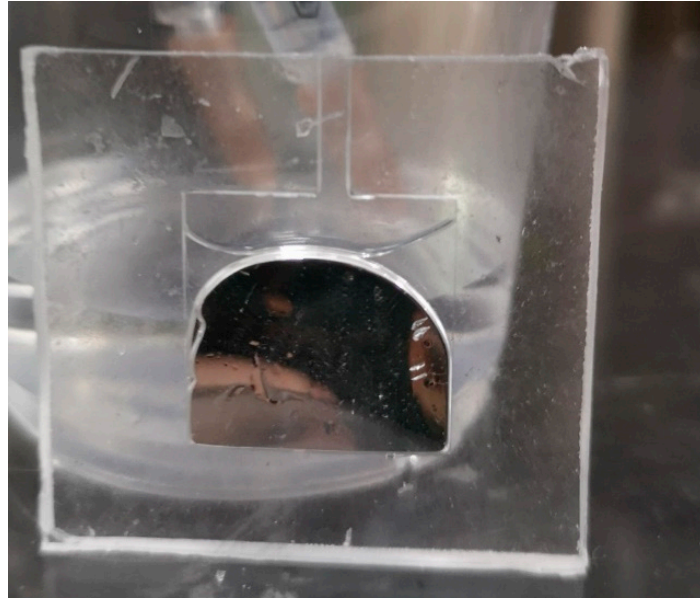

**Figure S3.** In an attempted process route, the substrate was made of PDMS.

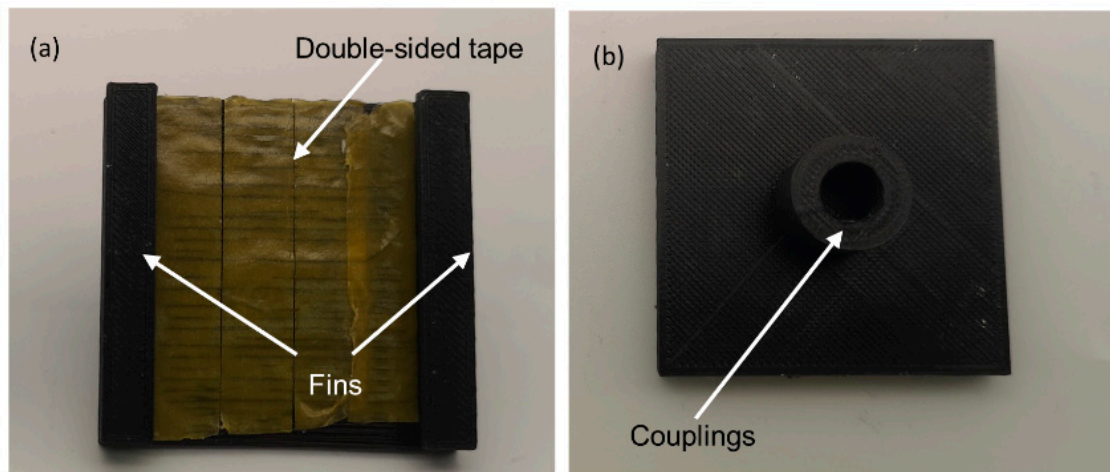

**Figure S4.** Another clamp with two fins, which are convenient to fix the antenna but also affect the radiation field.
