# Supplementary material for: A Gravity-Triggered Liquid Metal Patch Antenna with Reconfigurable Frequency
Source: Micromachines (Basel). 2021 Jun 16;12(6):701. doi: 10.3390/mi12060701 (PMC8234692; doi:10.3390/mi12060701)
Supplement: Supplementary file 1 [file micromachines-12-00701-s001.zip › Table S2.xlsx]

## Sheet: Sheet1
Keysight Technologies	E5063A
Temperature	20 degree celsius
	-90°	-80°	-70°	-60°	-50°	-40°	-30°	-20°	-10°	0°	+10°	+20°	+30°	+40°	+50°	+60°	+70°	+80°	+90°
Frequency（GHz）	S11 (dB)	S11 (dB)	S11 (dB)	S11 (dB)	S11 (dB)	S11 (dB)	S11 (dB)	S11 (dB)	S11 (dB)	S11 (dB)	S11 (dB)	S11 (dB)	S11 (dB)	S11 (dB)	S11 (dB)	S11 (dB)	S11 (dB)	S11 (dB)	S11 (dB)
0.0003	0.0268494	0.0192567	0.0274374	0.0246695	0.0172153	0.0264156	0.0328852	0.0213209	0.02837	0.0168576	0.0256788	0.0189134	0.0244725	0.0221474	0.0349939	0.0109179	0.0155105	0.0170199	0.00994712
0.0902985	-0.511619	-0.5061	-0.504132	-0.507837	-0.59133	-0.53736	-0.545863	-0.525747	-0.52603	-0.524567	-0.51848	-0.521982	-0.515812	-0.523205	-0.523979	-0.519258	-0.520295	-0.516782	-0.527418
0.180297	-0.610573	-0.605367	-0.601045	-0.609784	-0.794749	-0.656952	-0.65908	-0.613179	-0.60738	-0.602908	-0.603291	-0.599365	-0.603738	-0.617573	-0.612871	-0.620547	-0.616136	-0.614042	-0.615054
0.270296	-0.592502	-0.595631	-0.583519	-0.593028	-0.846761	-0.648619	-0.653943	-0.58506	-0.578836	-0.571788	-0.569034	-0.571903	-0.576337	-0.597773	-0.594381	-0.604809	-0.597791	-0.594267	-0.592885
0.360294	-0.572336	-0.569214	-0.565796	-0.570091	-0.866391	-0.637407	-0.637573	-0.564235	-0.552407	-0.543351	-0.541519	-0.550498	-0.547648	-0.572662	-0.565546	-0.58281	-0.579562	-0.57484	-0.572493
0.450292	-0.557117	-0.557793	-0.550482	-0.554354	-0.877231	-0.627072	-0.621882	-0.541953	-0.532592	-0.522692	-0.522909	-0.526808	-0.534528	-0.555392	-0.550026	-0.567046	-0.562929	-0.559223	-0.557828
0.540291	-0.542116	-0.541958	-0.538345	-0.544301	-0.882275	-0.616095	-0.61251	-0.529295	-0.520139	-0.507513	-0.507871	-0.510857	-0.521157	-0.5449	-0.535715	-0.554755	-0.552018	-0.544451	-0.543911
0.630289	-0.528847	-0.527386	-0.522997	-0.52812	-0.882092	-0.603785	-0.602475	-0.514315	-0.503934	-0.493715	-0.493849	-0.500043	-0.506828	-0.527836	-0.520648	-0.542397	-0.53847	-0.533061	-0.53176
0.720288	-0.523181	-0.520069	-0.518034	-0.52358	-0.895714	-0.604531	-0.602678	-0.50689	-0.500522	-0.489383	-0.488581	-0.49459	-0.501674	-0.521394	-0.513212	-0.537509	-0.532578	-0.528195	-0.52703
0.810287	-0.523703	-0.520421	-0.516424	-0.523682	-0.899731	-0.599461	-0.60539	-0.505118	-0.49913	-0.487863	-0.490364	-0.496202	-0.50027	-0.51619	-0.5154	-0.540652	-0.534405	-0.529051	-0.52582
0.900285	-0.521723	-0.521693	-0.520636	-0.527115	-0.917359	-0.611574	-0.618523	-0.515499	-0.506207	-0.493526	-0.494874	-0.502249	-0.506504	-0.521707	-0.518506	-0.542048	-0.539724	-0.534449	-0.530379
0.990283	-0.553206	-0.55209	-0.547454	-0.558048	-0.949073	-0.63832	-0.650195	-0.54025	-0.53624	-0.525071	-0.527834	-0.531601	-0.535942	-0.550861	-0.546669	-0.573447	-0.566909	-0.564565	-0.56166
1.08028	-0.553811	-0.545821	-0.541769	-0.547696	-0.944447	-0.634664	-0.647413	-0.536404	-0.532562	-0.52233	-0.523592	-0.529927	-0.532787	-0.550684	-0.545175	-0.568086	-0.565948	-0.559576	-0.557068
1.17028	-0.550032	-0.548583	-0.540575	-0.55326	-0.958129	-0.635562	-0.652588	-0.541698	-0.535736	-0.52318	-0.522533	-0.529931	-0.533005	-0.54684	-0.542846	-0.575296	-0.565313	-0.559228	-0.558801
1.26028	-0.544785	-0.542108	-0.531438	-0.546049	-0.939415	-0.630977	-0.641359	-0.533454	-0.529623	-0.520414	-0.51873	-0.525561	-0.525966	-0.539435	-0.539794	-0.563682	-0.55667	-0.553717	-0.553088
1.35028	-0.556675	-0.54798	-0.545292	-0.554195	-0.939151	-0.634972	-0.648636	-0.540702	-0.540073	-0.530078	-0.533967	-0.537045	-0.541027	-0.553246	-0.550285	-0.572768	-0.564931	-0.561749	-0.561014
1.44028	-0.57901	-0.570509	-0.565416	-0.569896	-0.953787	-0.648356	-0.663084	-0.554418	-0.555367	-0.543177	-0.542127	-0.550294	-0.550018	-0.563598	-0.560311	-0.583652	-0.576732	-0.571378	-0.569421
1.53027	-0.579289	-0.574064	-0.568997	-0.573929	-0.936209	-0.648324	-0.66675	-0.563268	-0.559535	-0.553053	-0.548827	-0.55223	-0.556428	-0.56787	-0.566046	-0.588303	-0.583295	-0.585998	-0.580077
1.62027	-0.626751	-0.612818	-0.602735	-0.602253	-0.941055	-0.67057	-0.701783	-0.59741	-0.597273	-0.590432	-0.593299	-0.595399	-0.597828	-0.610469	-0.605422	-0.627425	-0.615855	-0.617814	-0.617766
1.71027	-0.669704	-0.644928	-0.63263	-0.63122	-0.950335	-0.694518	-0.717019	-0.614772	-0.615657	-0.606904	-0.607174	-0.61281	-0.610927	-0.630859	-0.623915	-0.64257	-0.635545	-0.63994	-0.636833
1.80027	-0.69999	-0.666848	-0.652673	-0.657958	-0.944479	-0.7078	-0.731749	-0.642874	-0.644117	-0.646908	-0.63223	-0.646464	-0.649274	-0.656847	-0.659276	-0.672086	-0.662144	-0.661458	-0.665781
1.89027	-0.749337	-0.720085	-0.703854	-0.703321	-0.947884	-0.735933	-0.76046	-0.67541	-0.675587	-0.680656	-0.672666	-0.677081	-0.678375	-0.682957	-0.684842	-0.702748	-0.696232	-0.696819	-0.701773
1.98027	-0.799846	-0.765921	-0.738674	-0.729321	-0.937035	-0.753514	-0.772094	-0.705364	-0.704754	-0.710095	-0.709682	-0.712886	-0.7141	-0.722306	-0.723121	-0.73082	-0.736991	-0.73427	-0.739851
2.07027	-0.873485	-0.819918	-0.785105	-0.773415	-0.92608	-0.781383	-0.785654	-0.746498	-0.747049	-0.751889	-0.746909	-0.755721	-0.753427	-0.762949	-0.7671	-0.768583	-0.772167	-0.773009	-0.777798
2.16026	-0.94981	-0.887503	-0.852984	-0.83616	-0.931497	-0.830041	-0.826903	-0.805827	-0.806987	-0.810256	-0.795308	-0.797621	-0.79804	-0.806718	-0.809097	-0.814205	-0.819097	-0.82647	-0.836015
2.25026	-1.06201	-0.993233	-0.94952	-0.921736	-0.963501	-0.894739	-0.897215	-0.8833	-0.881628	-0.876762	-0.874297	-0.870521	-0.872962	-0.88686	-0.887545	-0.888676	-0.896138	-0.903077	-0.912814
2.34026	-1.19868	-1.11727	-1.06343	-1.03227	-1.0195	-0.985373	-0.985887	-0.966183	-0.959791	-0.952248	-0.949139	-0.957542	-0.95643	-0.963862	-0.971974	-0.970358	-0.978814	-0.988381	-1.00282
2.43026	-1.34192	-1.24591	-1.17102	-1.14427	-1.11607	-1.0888	-1.06507	-1.05718	-1.05453	-1.05531	-1.03557	-1.03803	-1.0445	-1.04953	-1.0634	-1.10262	-1.08124	-1.09208	-1.11215
2.52026	-1.54131	-1.4247	-1.34096	-1.32128	-1.29442	-1.27637	-1.24125	-1.18396	-1.18713	-1.17748	-1.16531	-1.16731	-1.17338	-1.18385	-1.1862	-1.1953	-1.21687	-1.23568	-1.26462
2.61026	-1.72028	-1.57675	-1.48468	-1.4527	-1.47394	-1.43887	-1.39643	-1.29891	-1.28736	-1.27933	-1.27096	-1.27849	-1.27486	-1.27693	-1.29158	-1.29899	-1.32619	-1.3472	-1.37668
2.70025	-1.93509	-1.7803	-1.6723	-1.63148	-1.756	-1.71008	-1.63309	-1.45369	-1.43591	-1.41649	-1.39506	-1.40357	-1.4071	-1.40973	-1.4304	-1.44636	-1.47356	-1.49702	-1.53635
2.79025	-2.16354	-2.00359	-1.88999	-1.83697	-2.0976	-2.09292	-1.93008	-1.61836	-1.59896	-1.55621	-1.53144	-1.53057	-1.53843	-1.54267	-1.55882	-1.5931	-1.62753	-1.65969	-1.71258
2.88025	-2.4009	-2.23202	-2.10626	-2.06275	-2.47945	-2.64888	-2.32545	-1.81532	-1.78155	-1.71816	-1.68941	-1.69714	-1.70346	-1.69939	-1.72056	-1.7659	-1.80504	-1.84075	-1.8983
2.97025	-2.67704	-2.49937	-2.37595	-2.34658	-2.8743	-3.44517	-2.8428	-2.04441	-2.00117	-1.90777	-1.86473	-1.87383	-1.87404	-1.87181	-1.90055	-1.96734	-2.01218	-2.05563	-2.13141
3.06025	-2.9625	-2.77603	-2.65134	-2.65244	-3.27715	-4.48325	-3.45772	-2.2708	-2.209	-2.11065	-2.05168	-2.0574	-2.05583	-2.04162	-2.07604	-2.1696	-2.22659	-2.28157	-2.36757
3.15025	-3.26819	-3.07683	-2.95482	-2.98309	-3.72779	-5.68618	-4.12228	-2.54334	-2.46834	-2.3278	-2.25872	-2.25654	-2.25527	-2.24169	-2.27877	-2.40289	-2.46276	-2.53533	-2.64712
3.24025	-3.58275	-3.39456	-3.26945	-3.35289	-4.18142	-6.82556	-4.82476	-2.86604	-2.75469	-2.58901	-2.4875	-2.47877	-2.47232	-2.46133	-2.51695	-2.65931	-2.72812	-2.81694	-2.93696
3.33024	-3.87169	-3.71055	-3.61446	-3.75947	-4.66153	-7.6078	-5.50912	-3.26864	-3.11155	-2.84481	-2.71628	-2.69336	-2.68079	-2.66897	-2.73846	-2.91267	-3.00338	-3.11296	-3.26849
3.42024	-4.18678	-4.05565	-4.0106	-4.22788	-5.21279	-8.05675	-6.26703	-3.78343	-3.5406	-3.19105	-3.00162	-2.94799	-2.9233	-2.91923	-3.00589	-3.20729	-3.32214	-3.46141	-3.64215
3.51024	-4.51661	-4.4273	-4.43818	-4.7367	-5.84338	-8.5234	-7.09017	-4.43646	-4.04864	-3.59305	-3.3125	-3.21298	-3.17199	-3.18272	-3.29278	-3.52979	-3.6757	-3.83895	-4.06134
3.60024	-4.88813	-4.84106	-4.89951	-5.32902	-6.68682	-9.33474	-8.13377	-5.31366	-4.75399	-4.08892	-3.67833	-3.49966	-3.43851	-3.4738	-3.62861	-3.89795	-4.0685	-4.27136	-4.53911
3.69024	-5.33798	-5.31944	-5.45831	-6.06676	-7.8469	-10.8781	-9.73929	-6.70802	-5.80245	-4.77373	-4.14346	-3.85676	-3.75764	-3.87687	-4.09345	-4.39027	-4.58487	-4.82762	-5.15959
3.78024	-5.85154	-5.86401	-6.11586	-6.91764	-9.35039	-13.3206	-12.3586	-8.8531	-7.27121	-5.70544	-4.73238	-4.24957	-4.09747	-4.3892	-4.69853	-5.00846	-5.20588	-5.48908	-5.89509
3.87024	-6.49661	-6.54875	-6.9514	-8.03869	-11.3755	-16.74	-16.9757	-12.1832	-9.22163	-6.83887	-5.3984	-4.73264	-4.54557	-5.05863	-5.52833	-5.86447	-6.04286	-6.35955	-6.85155
3.96023	-7.35339	-7.41464	-7.994	-9.50345	-13.9607	-18.0404	-24.3127	-17.2371	-11.2611	-7.89067	-6.0768	-5.2602	-5.11105	-5.69292	-6.43349	-6.99194	-7.19073	-7.55338	-8.16309
4.05023	-8.48587	-8.56879	-9.40514	-11.5039	-16.2306	-15.4908	-20.831	-19.6594	-12.2544	-8.59994	-6.73419	-5.9546	-5.86393	-6.28296	-7.20868	-8.23122	-8.70565	-9.18394	-9.96098
4.14023	-9.97963	-10.211	-11.4081	-14.2069	-16.3649	-13.0013	-16.2571	-16.4054	-12.248	-9.20694	-7.51802	-6.82252	-6.80998	-6.99144	-7.954	-9.431	-10.6218	-11.5463	-12.6897
4.23023	-11.7026	-12.3395	-13.9792	-16.8329	-14.5165	-11.3968	-14.1383	-14.4872	-12.513	-10.1876	-8.68396	-8.0585	-8.08593	-7.99992	-9.02055	-10.8044	-12.9407	-14.9545	-16.856
4.32023	-13.8222	-15.2809	-16.9675	-17.3606	-12.8014	-10.5218	-13.2036	-14.0023	-13.5289	-11.847	-10.3894	-9.71694	-9.77426	-9.37459	-10.54	-12.7498	-16.1704	-20.6006	-24.1692
4.41023	-16.9489	-18.9937	-17.9668	-14.8686	-11.1882	-9.76298	-12.5608	-14.379	-15.7642	-14.9229	-13.289	-12.3118	-12.2882	-11.5032	-12.9854	-16.0208	-22.0742	-40.0833	-24.7186
4.50023	-21.7427	-20.0554	-15.3269	-12.2129	-9.69015	-9.03758	-11.8302	-14.1218	-18.459	-20.0902	-17.8842	-16.3118	-16.0445	-14.5677	-16.7123	-21.6856	-29.6772	-21.4165	-17.554
4.59022	-23.4474	-16.6294	-12.4627	-10.014	-8.40875	-8.17129	-10.5067	-12.4907	-17.0716	-22.4918	-27.4179	-24.1152	-22.48	-19.2735	-22.3075	-24.9116	-19.8665	-15.6967	-13.7668
4.68022	-17.5575	-13.0271	-10.1115	-8.25525	-7.22797	-7.11566	-8.94472	-10.2582	-13.3374	-16.432	-20.7466	-24.377	-23.8292	-24.2035	-22.1618	-18.3778	-14.8779	-12.4449	-11.333
4.77022	-13.5203	-10.5565	-8.41062	-6.99719	-6.27591	-6.23436	-7.60861	-8.28053	-10.4694	-12.3968	-14.9933	-16.9814	-17.4378	-19.5666	-16.8714	-14.3402	-12.0563	-10.4508	-9.70071
4.86022	-10.6989	-8.68785	-7.09225	-5.98514	-5.54469	-5.47784	-6.48282	-6.81535	-8.43787	-9.88833	-11.6739	-13.0507	-13.5972	-15.0482	-13.4205	-11.7442	-10.199	-9.02983	-8.50229
4.95022	-8.72762	-7.31723	-6.15116	-5.24961	-4.95414	-4.93069	-5.70518	-5.76165	-7.05033	-8.24661	-9.6168	-10.7076	-11.187	-12.3048	-11.1783	-10.0051	-8.85374	-8.03568	-7.70594
5.04022	-7.32501	-6.31882	-5.4351	-4.70663	-4.52908	-4.54324	-5.14786	-5.06088	-6.12373	-7.14351	-8.25175	-9.17722	-9.70276	-10.5097	-9.69428	-8.81808	-7.98265	-7.37555	-7.0925
5.13021	-6.35702	-5.58863	-4.87441	-4.30458	-4.21457	-4.28182	-4.77636	-4.59556	-5.46864	-6.34906	-7.29607	-8.05206	-8.62068	-9.27162	-8.66081	-7.99222	-7.33414	-6.87622	-6.68698
5.22021	-5.66823	-5.07123	-4.49196	-4.02722	-3.99885	-4.1392	-4.57477	-4.27198	-5.06919	-5.84847	-6.65068	-7.36977	-7.91338	-8.37634	-7.934	-7.44444	-6.91325	-6.54927	-6.42228
5.31021	-5.18816	-4.71508	-4.23742	-3.90635	-3.90271	-4.08939	-4.48554	-4.11518	-4.86566	-5.54298	-6.27608	-6.91802	-7.43103	-7.80996	-7.43603	-7.0699	-6.65154	-6.37103	-6.29548
5.40021	-4.86052	-4.46994	-4.11481	-3.82687	-3.83779	-4.1165	-4.52267	-4.08856	-4.6998	-5.38139	-6.00314	-6.577	-7.13741	-7.33851	-7.09818	-6.83231	-6.53221	-6.30256	-6.20431
5.49021	-4.68023	-4.33907	-4.05912	-3.80686	-3.84656	-4.14983	-4.57688	-4.05998	-4.65686	-5.28387	-5.8321	-6.36445	-6.88323	-6.99089	-6.78621	-6.62246	-6.3694	-6.20578	-6.14948
5.58021	-4.71472	-4.39764	-4.14931	-3.9382	-3.96339	-4.29447	-4.71097	-4.19568	-4.73924	-5.33336	-5.78905	-6.24878	-6.73628	-6.71432	-6.62161	-6.51671	-6.3349	-6.21578	-6.19287
5.67021	-4.86726	-4.57793	-4.32809	-4.13228	-4.18492	-4.50134	-4.93138	-4.37869	-4.91544	-5.48137	-5.84221	-6.22792	-6.58865	-6.47748	-6.43635	-6.41437	-6.30295	-6.25066	-6.24342
5.7602	-5.18999	-4.90657	-4.65058	-4.43232	-4.44755	-4.74014	-5.11863	-4.66281	-5.16348	-5.66149	-5.95321	-6.18567	-6.44045	-6.19785	-6.24072	-6.30935	-6.27207	-6.27137	-6.24736
5.8502	-5.6524	-5.38195	-5.09082	-4.84298	-4.78694	-5.03049	-5.40864	-5.02447	-5.50252	-5.94814	-6.05024	-6.15894	-6.18742	-5.85006	-5.96515	-6.12914	-6.16017	-6.19964	-6.18113
5.9402	-6.20052	-5.87652	-5.49337	-5.25397	-5.07901	-5.23199	-5.59398	-5.31199	-5.78204	-6.10656	-6.07399	-5.98078	-5.84085	-5.45117	-5.58296	-5.82137	-5.90726	-5.97472	-5.98617
6.0302	-6.88333	-6.45657	-5.96536	-5.63294	-5.33127	-5.38934	-5.77879	-5.57432	-6.01829	-6.22274	-6.03635	-5.76293	-5.42902	-5.00303	-5.16612	-5.41097	-5.54956	-5.63628	-5.66515
